# Supplementary material for: Identification of DNA methylation-driven genes in esophageal squamous cell carcinoma: a study based on The Cancer Genome Atlas
Source: PubMed Central journal article supplement (PMC6404309; doi:10.1186/s12935-019-0770-9), 2019-03-06

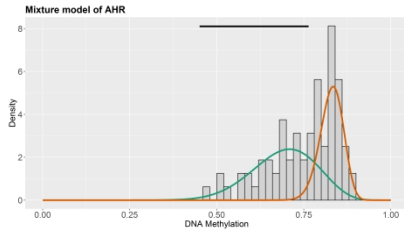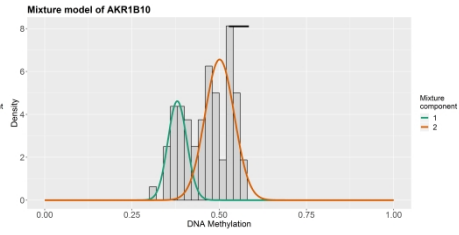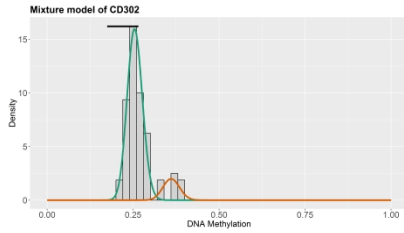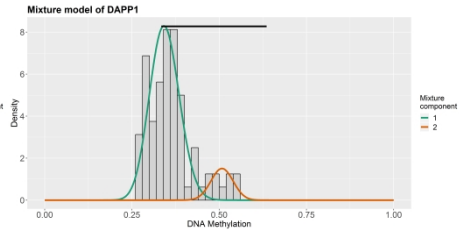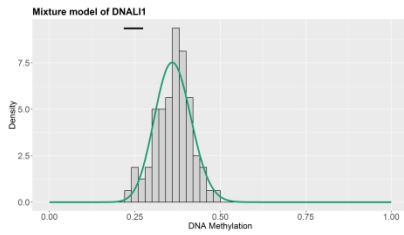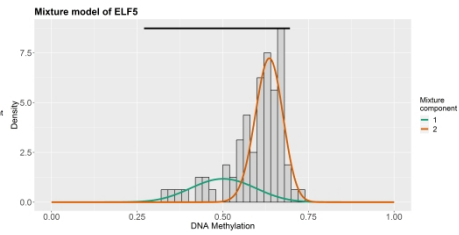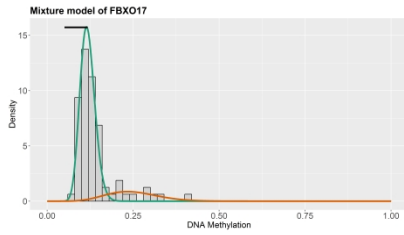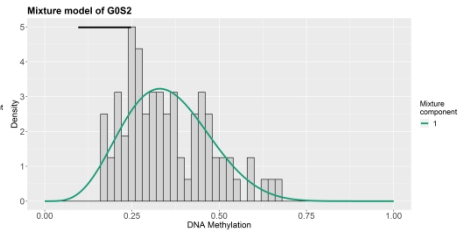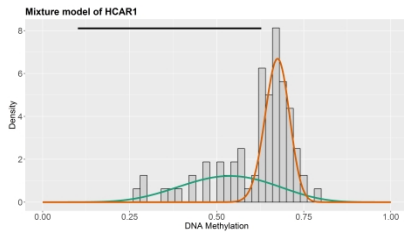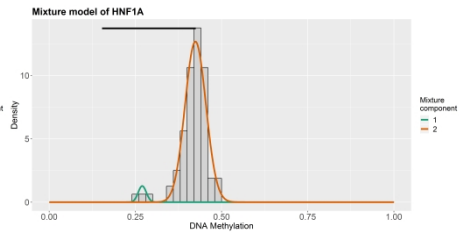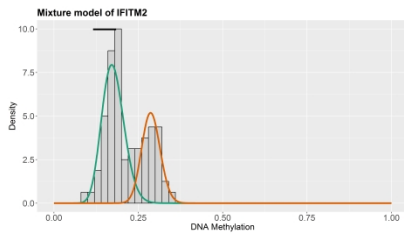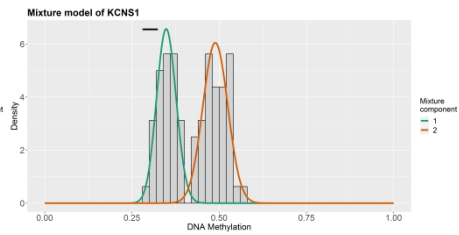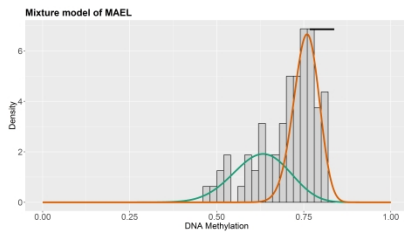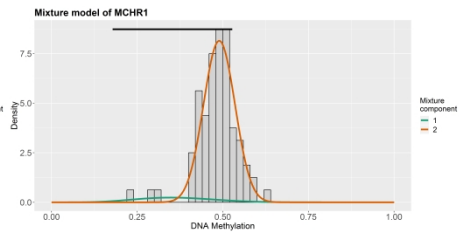

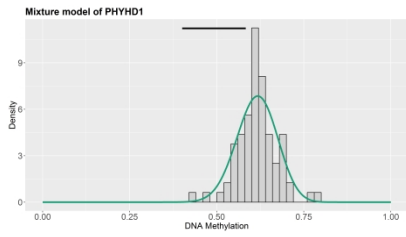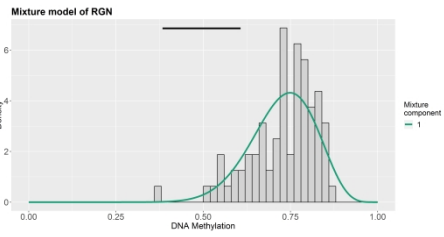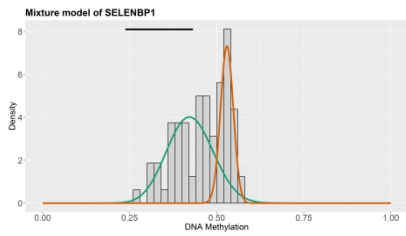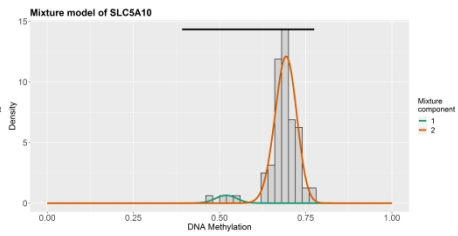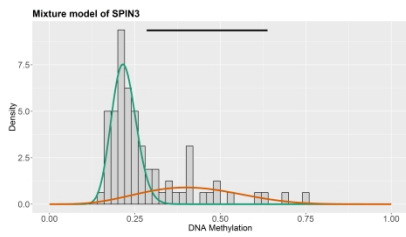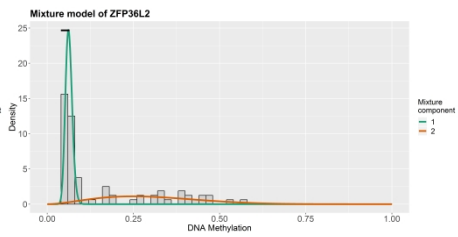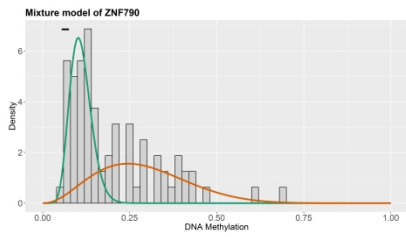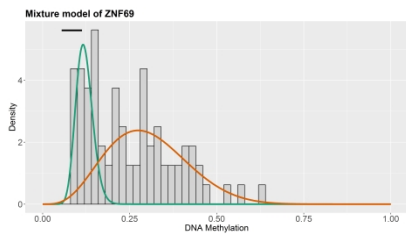

Supplement: 12935_2019_770_MOESM2_ESM.pdf [file 12935_2019_770_MOESM2_ESM.pdf]
